# Supplementary material for: A comparison of methods for differential expression analysis of RNA-seq data
Source: Springer Nature journal article supplement (doi:10.1186/1471-2105-14-91), 2013-03-09

**A** Type I error rate at  $p_{\text{nom}} < 0.05$ ,  $B_0^0$ 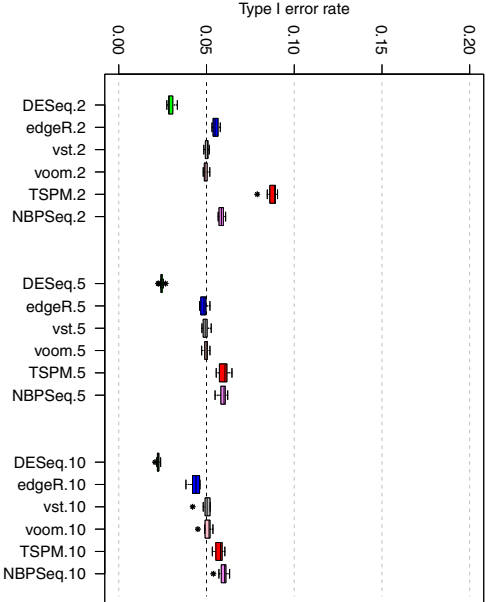**B** Type I error rate at  $p_{\text{nom}} < 0.05$ ,  $P_0^0$ 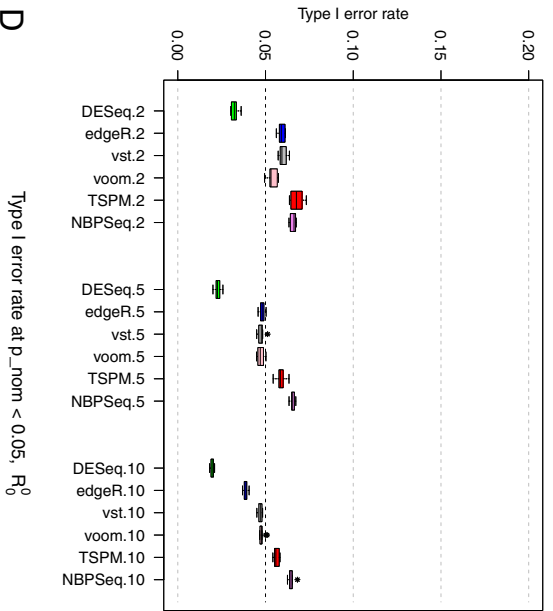**C** Type I error rate at  $p_{\text{nom}} < 0.05$ ,  $S_0$ 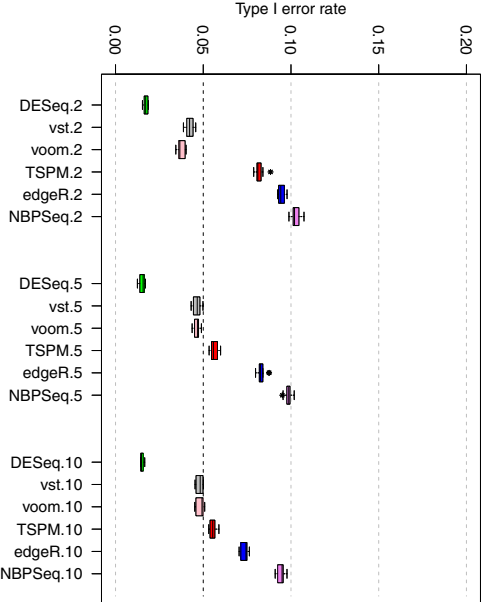**D** Type I error rate at  $p_{\text{nom}} < 0.05$ ,  $R_0^0$ 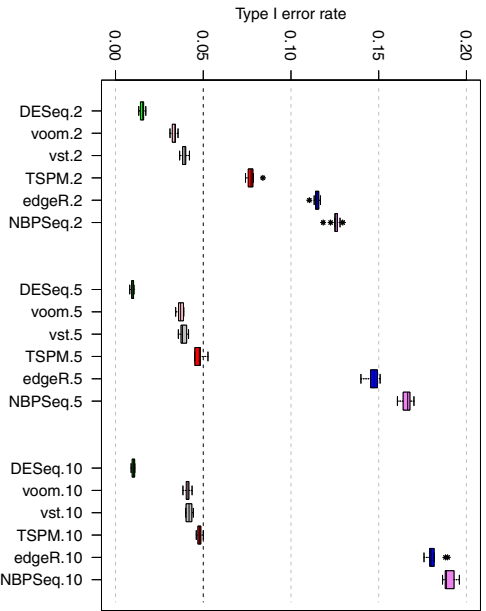

Supplement: 12859_2012_5756_MOESM4_ESM.pdf [file 12859_2012_5756_MOESM4_ESM.pdf]
