# Supplementary material for: A comparison of methods for differential expression analysis of RNA-seq data
Source: Springer Nature journal article supplement (doi:10.1186/1471-2105-14-91), 2013-03-09

**A**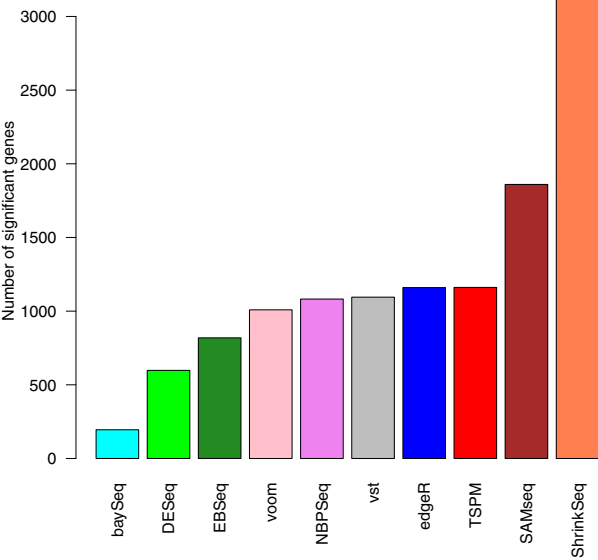**B**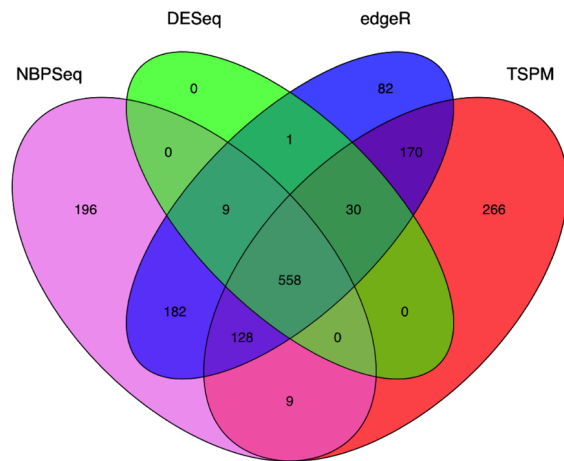**C**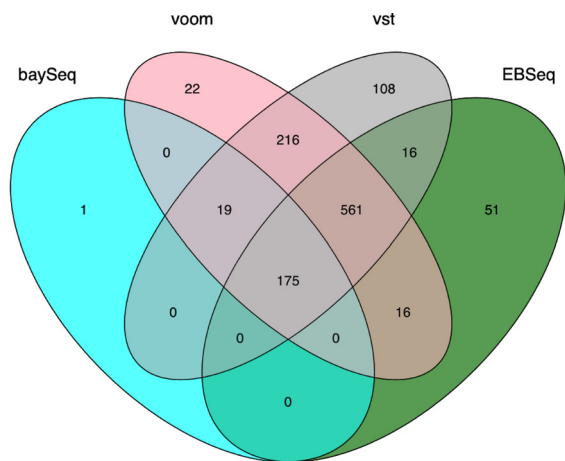**D**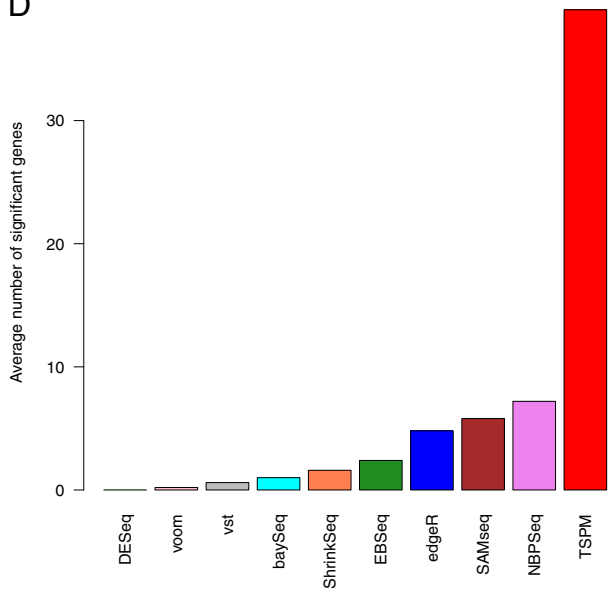

Supplement: 12859_2012_5756_MOESM6_ESM.pdf [file 12859_2012_5756_MOESM6_ESM.pdf]
